# Supplementary material for: Risk and protective factors of healthy cognitive ageing across diverse global cohorts and causal effect of education
Source: Research Square preprint supplement (doi:10.21203/rs.3.rs-7195000/v1), 2025-07-31
Supplement: Supplementary file 1 [file 85aa297df0feadf972c91672.docx]

**Table 1 Clinical demographics of cohorts with demographical variations**

|  | | | | |  | | |  | | | |  | |  | | |  | |  | |  |
| --- | --- | --- | --- | --- | --- | --- | --- | --- | --- | --- | --- | --- | --- | --- | --- | --- | --- | --- | --- | --- | --- |
|  | |  | | |  | | |  | | | |  | |  |  |  | |  | |
| Demographics | British | | Hong Kong Chinese | Australian | | Swedish | German | | Singaporean Chinese | ANCOVA p-value * | Tukey post hoc p-value # | |
| Whitehall II (n=536) | | CU-RISK (n=494) | MAS (n=302) | | Betula (n=94) | BASE-II (n=102) | | SLABS (n = 108) |
| Age (y), mean ± SD | 68.20 ± 5.22 | | 70.78 ± 4.50 | 78.82 ± 4.38 | | 68.29 ± 6.06 | 69.89 ± 3.49 | | 72.07 ± 5.64 | <0.001 | <0.05 a, b, e, f, g, j, k, l,n | |
| Male, n (%) | 436 (81.34%) | | 180 (36.44%) | 140 (46.36%) | | 42 (44.68%) | 58 (56.86%) | | 50 (46.30%) | <0.001 | <0.05 a, b, c, e, f, g, h, k, m, o | |
| Education (y), mean ± SD | 14.87 ± 3.42 | | 8.08 ± 4.91 | 11.83 ± 3.64 | | 12.46 ± 4.53 | 14.65± 2.95 | | 12.09 ± 3.82 | <0.001 | <0.05 a, b, c, e, f, g, h, i | |
| Follow-up period (y), mean ± SD | 3.20 ± 0.33 | | 3.23 ± 0.34 | 3.96 ± 0.15 | | 4.81 ± 0.40 | 7.77 ± 1.31 | | 3.34 ± 0.91 | <0.001 | <0.05 b, c, d, f, g, h, j, k, l, m, n, o | |
| General cognition (MMSE) at TP1, mean ± SD | 28.60 ± 1.24 | | \ | 28.26 ± 1.53 | | 27.93 ± 1.59 | 28.73 ± 1.97 | | 27.82 ± 1.55 | \ | \ | |
| General cognition (MMSE) at TP2, mean ± SD | 28.59 ± 1.38 | | \ | 27.70 ± 2.37 | | 28.04 ± 1.40 | 28.79 ± 1.16 | | 27.65 ± 1.92 | \ | \ | |
| General cognition (MoCA) at TP 1, mean ± SD | \ | | 23.33 ± 3.57 | \ | | \ | \ | | \ | \ | \ | |
| General cognition (MoCA) at TP 2, mean ± SD | \ | | 22.98 ± 4.14 | \ | | \ | \ | | \ | \ | \ | |
| General cognition (all converted to MMSE) at TP1, mean ± SD | 28.60 ± 1.24 | | 27.78 ± 2.61 | 28.26 ± 1.53 | | 27.93 ± 1.59 | 28.73 ± 1.97 | | 27.82 ± 1.55 | <0.001 | <0.05 a, b, c, e | |
| General cognition (all converted to MMSE) at TP2, mean ± SD | 28.59 ± 1.38 | | 27.38 ± 3.12 | 27.70 ± 2.37 | | 28.04 ± 1.40 | 28.79 ± 1.16 | | 27.65 ± 1.92 | <0.001 | <0.05 a, b, e | |
| Depressive symptoms (GDS/CES-D*) at TP1, n (%) | 43 (8.02%) | | 77 (15.59%) | 30 (9.93%) | | 7 (7.45%) | 10 (9.80%) | | 7 (6.48%) | 0.002 | <0.05 a | |
| Depressive symptoms (GDS/CES-D*) at TP2, n (%) | 45 (8.40%) | | 112 (22.67%) | 52 (17.22%) | | 8 (8.51%) | 5 (4.90%) | | 9 (8.33%) | <0.001 | <0.05 a, g, i | |
| Fasting blood glucose, mean ± SD | 5.40 ± 1.13 | | 5.66 ± 1.00 | 5.81 ± 0.94 | | 5.43 ± 1.75 | 5.17 ± 1.02 | | 5.58 ± 1.62 | <0.001 | <0.05 a, b | |
| Body mass index, mean ± SD | 26.33 ± 4.07 | | 23.42 ± 3.27 | 26.97 ± 4.09 | | 26.34 ± 3.32 | 26.81 ± 3.49 | | 23.41 ± 2.81 | <0.001 | <0.05 a, e, f, g, h, l, n, o | |
| Systolic blood pressure, mean ± SD | 126.22 ± 15.63 | | 143.59 ± 20.26 | 142.68 ± 18.18 | | 137.44 ± 17.87 | 111.27 ± 11.94 | | 139.22 ± 11.87 | <0.001 | <0.05 a, b, c, d, e, h, k, m, o | |
| Hypertension, n (%) | 183 (34.14%) | | 295 (59.72%) | 173 (57.28%) | | 37 (39.36%) | 56 (54.90%) | | 61 (56.48%) | <0.001 | <0.05 a, b, e | |
| Diabetes mellitus, n (%) | 39 (7.28%) | | 105 (21.26%) | 36 (11.92%) | | 6 (6.38%) | 6 (5.88%) | | 18 (16.67%) | <0.001 | <0.05 a, e | |
| Smoking, n (%) | 15 (2.80%) | | 83 (16.80%) | 147 (48.68%) | | 45 (47.87%) | 53 (51.96%) | | 25 (23.15%) | <0.001 | <0.05 a, b, c, d, e, f, g, h, l, n, o | |
| Exercise, n (%) | 263 (49.07%) | | 355 (71.86%) | 161 (53.31%) | | 58 (61.70%) | 23 (22.55%) | | 103 (95.37%) | <0.001 | <0.05 a, e, f, h, i, l, m, n, o | |
| Normalised white matter hyperintensity volume (mL), mean ± SD | 0.42 ± 0.28 | | 0.63 ± 0.23 | 0.80 ± 0.42 | | \ | 0.93 ± 0.18 | | 0.87 ± 0.25 | <0.001 | <0.05 a, b, d, e, f, h, i, k | |
| Normalised grey matter volume (mm3), mean ± SD | 694547.77 ± 41718.59 | | 712641.20 ± 35980.57 | 688372.84 ± 35830.36 | | 735262.62 ± 38655.61 | 683747.03 ± 37945.84 | | 709443.86 ± 36800.57 | <0.001 | <0.05 a, b, c, d, e, f, g, h, j, l, m, n, o | |
| Mean diffusivity (10-4mm2/s), mean ± SD | 6.72 ± 0.26 | | 7.36 ± 0.26 | 7.80 ± 0.30 | | 7.92 ± 0.25 | 7.65 ± 0.24 | | 8.23 ± 0.25 | <0.001 | <0.05 a, b, c, d, e, f, g, h, i, j, l, m, n, o | |
| Normalised hippocampal volume (mL), mean ± SD | 0.50 ± 0.06 | | 0.51 ± 0.06 | 0.48 ± 0.06 | | 0.53 ± 0.06 | 0.53 ± 0.05 | | 0.50 ± 0.06 | <0.001 | <0.05 b, c, f, g, j, k, l, n | |

Table 1 showed the clinical demographics between the six cohorts. Table 1 showed the clinical demographics of all 6 cohorts. Since only 1 cohort used the MoCA while the other 6 cohorts used MMSE, the MoCA score of that cohort was converted to MMSE. (1)

*A cut-off at 16 was applied on the CES-D to indicate depression (2) while GDS cut off at 5 to indicate depression (3).

Footnote: a: Whitehall versus CUHK; b: Whitehall versus MAS; c: Whitehall versus Betula; d: Whitehall versus BASE; e: Whitehall versus SLABS; f: CUHK versus MAS; g: CUHK versus Betula; h: CUHK versus BASE; i: CUHK versus SLABS; j: MAS versus BASE; k: MAS versus BASE; l: MAS versus SLABS; m: Betula versus BASE; n: Betula versus SLABS; o: BASE versus SLABS

Abbreviations: TP = time point
