# Supplementary material for: Risk and protective factors of healthy cognitive ageing across diverse global cohorts and causal effect of education
Source: Research Square preprint supplement (doi:10.21203/rs.3.rs-7195000/v1), 2025-07-31
Supplement: Supplementary file 2 [file 937ae5cd19c738381dbf6f90.docx]

| **Supplementary Table 1 Details of cohort characteristics** | | | | | | | | | | | | | |
| --- | --- | --- | --- | --- | --- | --- | --- | --- | --- | --- | --- | --- | --- |
| Cohort | Cohort recruitment period | Data collection period for the timepoints used in this study | Ethnicity (self-reported) | Health status | Cohort age range | Study design | Total Sample size (n) | With longitudinal cognition data (n) | Cognition follow-up interval (yrs) | Sample size with longitudinal cognitive data & fitting study inclusion criteria | Time-point 1 | Time-point 2 |
| British Whitehall-II | 1985-current | 2012-2016 | British | Community-dwelling | 60 to 85 | Longitudinal | 800 | 800 | 2 to 3 | 536 | Phase 11 | Phase 12 |
| Hong Kong Chinese CU-RISK | 2011-2017 | 2011-2017 | Hong Kong Chinese | Community-dwelling | 65 to 80 | Longitudinal | 851 | 538 | 3 | 494 | Baseline | Year 3 follow-up |
| Australian MAS | 2005-2019 | 2007-2011 | Australian | Community-dwelling | 70-90 | Longitudinal | 1037 | 889 | 2 | 302 | Wave 2 | Wave 4 |
| Swedish Betula | 1988-2014 | 2008-2014 | Swedish | Community-dwelling | 25 to 80 | Longitudinal | 869 | 443 | 3 | 94 | Wave 5 | Wave 6 |
| German BASE-II | 2009-2020 | 2009-2020 | German | Community-dwelling | 60 to 80 | Longitudinal | 1591 | 1100 | 7.4 | 102 | Round 1 | Round 3 |
| Singaporean Chinese SLABS | 2005-2014 | 2007-2010 | Singapore Chinese | Community-dwelling | 56-83 | Longitudinal | 289 | 219 | 1.5 to 2 | 108 | Phase 2 | Phase 3 |
| Supplementary Table 1 illustrated the characteristics of the 6 cohorts with geographical variations. | | | | | | | | | | | | | |

**Supplementary Table 2 Changes of general cognition and depressive symptoms over time**

|  | General cognition | | p-value† | Depressive symptoms | | p-value† |
| --- | --- | --- | --- | --- | --- | --- |
|  | Baseline | Follow-up | Baseline | Follow-up |
| British Whitehall-II  (n=536) | 28.60 ± 1.24 | 28.59 ± 1.38 | 0.84 | 43 (8.02%) | 45 (8.40%) | 0.89 |
| Hong Kong Chinese CU-RISK  (n=494) | 27.78 ± 2.61 | 27.38 ± 3.12 | <0.001 | 77 (15.59%) | 112 (22.67%) | <0.001 |
| Australian MAS  (n=302) | 28.26 ± 1.53 | 27.70 ± 2.37 | <0.001 | 30 (9.93%) | 52 (17.22%) | <0.001 |
| Swedish Betula  (n=94) | 27.93 ± 1.59 | 28.04 ± 1.40 | 0.49 | 7 (7.45%) | 8 (8.51%) | 1 |
| German BASE-II  (n=102) | 28.73 ± 1.97 | 28.79 ± 1.16 | 0.64 | 10 (9.80%) | 5 (4.90%) | 0.23 |
| Singaporean Chinese SLABS  (n = 108) | 27.82 ± 1.55 | 27.65 ± 1.92 | 0.32 | 7 (6.48%) | 9 (8.33%) | 0.63 |

Supplementary Table 2 showed the changes of general cognition and depressive symptoms over time.

**Supplementary Table 3 The strength of the covariation between CCA individual scores in risk & protective factor and CCA individual scores in cognition & depressive symptoms**

|  |  |  |  |  |  |  |
| --- | --- | --- | --- | --- | --- | --- |
| ​Strength of covariation | British​ | Hong Kong Chinese​ | Australian​ | Swedish​ | German​ | Singaporean Chinese​ |
|  | Whitehall II | CU-RISK | MAS ​ | Betula ​ | BASE II | SLABS ​ |
| (n=536)​ | (n=494)​ | (n=302)​ | (n=94)​ | (n=102)​ | (n = 108)​ |
| Mode 1​ | 0.349 | 0.558 | 0.348 | 0.292 | 0.149 | 0.434 |
| Mode 2 | 0.02 | 0.176 | 0.162 | 0.306 | 0.153 | 0.183 |
| Mode 3 | 0.066 | 0.168 | 0.129 | 0.104 | 0.164 | 0.103 |

Supplementary Table 3showed the correlation between CCA individual scores in risk & protective factor and CCA individual scores in cognition & depressive symptoms; significance was estimated via 1,000 permutations of the rows of one matrix relative to the other.

**Supplementary Table 4 Neuropsychological assessments administered in each cohort**

|  | Cohort | General cognition | Attention and processing speed | Executive function | Memory |
| --- | --- | --- | --- | --- | --- |
| 1a | British Whitehall-II | MMSE | TMT A, Coding, Digit span F, CANTAB reaction time | Oxford: TMT B, CLOX (clock drawing task), Digit span B | RCFT recall and recognition, HVLT-R Whitehall - Cog battery - Number of words remembered |
| 1b | British Whitehall-II | MMSE | registration, serial 7s from MMSE (8 points); derived from MMSE | NA; derived from MMSE | recall 3 words derived from MMSE (3 points) ; Whitehall - Cog battery - Number of words remembered |
| 2 | Hong Kong Chinese CU-RISK | MoCA, MMSE | SDMT | Animal Fluency | MoCA- memory subdomain score |
| 3 | Australian MAS | MMSE | Digit Symbol-Coding, TMT A | Controlled Oral Word Association Test (FAS), TMT B | Logical Memory Story A delayed recall, Rey Auditory Verbal Learning Test, Benton Visual Retention Test recognition, |
| 4 | Swedish Betula | MMSE | Letter-digit substitution, pattern comparison | Phonemic fluency (starting with letter A, 5-letter words starting with M, names of professions starting with letter B), N-back test | Recognition of faces, immediate recall of 12-item word list (use a total recall score over 4 trials without concurrent task) |
| 5 | German BASE-II | MMSE* | Digit Symbol Substitution Test, | Multi-Source-Interference Task, Letter Updating, Spatial Updating, Number-N-Back | Picture-Word-Task, Face-Profession-Task, Object Location Task, Scene-Encoding, Verbal learning and memory test |
| 6 | Singaporean Chinese SLABS | MMSE | TMT, SDMT, Symbol Search Task, Digit span, spatial span | Design Fluency test, TMT B | Rey Auditory Verbal Learning Test, Visual Paired Associates test |

**Supplementary Table 4 Neuropsychological assessments administered in each cohort (continue)**

|  | Visuospatial | Language | Depressive symptoms | Motor | Intelligence quotient |
| --- | --- | --- | --- | --- | --- |
| 1a | RCFT copy, CANTAB | BNT-60, Verbal category fluency (animals) | GHQ, CESD, Mood Disorder Questionnaire, The State-Trait Anxiety Inventory, MacArthur stress reactivity questionnaire, Penn State Worry Questionnaire; Hamilton Depression Rating Scale | CANTAB, Pegboard Test | WAIS TOPF |
| 1b | Copy pentagons derived from MMSE (1 point) | Fluency test no of animals); naming, 3-stage command, sentence, 'close your eyes', repetition derived from MMSE (8 points) | GHQ, CESD | Functioning timed walk | NA |
| 2 | MoCA- visuospatial subdomain score | Animal Fluency | GDS | Pegboard Test | NA |
| 3 | Block Design | Boston Naming Test, Category Fluency (animals) | Goldberg Anxiety Scale, Kessler 10, GDS, World Health Organization Disability Assessment Schedule II, | Grooved Pegboard Test, lateral stability test, rigidity, rating of movement, speech, face and tremor, visual acuity, spirometry, grip strength, sit-to-stand test, timed “up-and-go” test, 6-meter timed walk, Brief Smell Identification Test | National Adult Reading Test-Revised |
| 4 | Block Design test | Fluency test | CESD | Katz-Activities Daily Living form | WAIS |
| 5 | NA | NA | CESD, GDS | Tinetti Mobility Test, Timed up & Go Test, Barthel Index (ADL), Lawton Instrumental Activities of Daily Living Scale (IADL), hand grip strength, anthropometric parameters, pulse wave velocity/ arterial stiffness (Mobil-o-Graph), echocardiography, electrocardiography (ECG), spirometry, motion monitoring (Actigraph), dual-energy X-ray absorptiometry (DXA) | Fluid intelligence (Letter series, Number series, Practical Problems) |
| 6 | NA | Categorical Verbal Fluency test (animals vegetables fruits), | NA | NA | NA |

Supplementary Table 4 illustrated the neuropsychological tests administered in each cohort in accordance to each cognitive domain and depressive symptoms.

Abbreviations: MMSE = Mini-mental state examination; TMT = Trial Making Test; RCFT = Rey Complex Figure Test and Recognition Trial; SDMT = symbol digit modality test; WAIS = Wechsler Adult Intelligence Scale; TOPF = Wechsler Adult Intelligence Scale Test of Premorbid Functioning; (FAS); HVLT-R = The Hopkins Verbal Learning Test - Revised; GDS = Geriatric Depression Scale; GHQ = General Health Questionnaire; CESD = Center for Epidemiologic Studies Depression Scale; NA = not applicable

*Note on BASE-II MMSE measure: An unauthorized version of the German MMSE was used by the study team without permission and has been rectified with PAR. The MMSE is a copyrighted instrument and may not be used or reproduced in whole or in part, in any form or language, or by any means without written permission of PAR (www.parinc.com).

**Supplementary Table 5a Details of variables used to measure cognition and depressive symptoms in the canonical correlation analysis and details of variable harmonisation**

| Cohorts | | | British Whitehall-II | | Hong Kong Chinese CU-RISK | Australian MAS | Swedish Betula | German BASE-II | Singaporean Chinese SLABS |
| --- | --- | --- | --- | --- | --- | --- | --- | --- | --- |
| General cognition at TP1 | variable name | FMM_SCOR | | MoCAtotalEDUadjusted | | W2h_Global_Cognition | MMT::v518 | MMSE_score_StudyRound1 | mmse |
| exact question | Measurement: MMSE (Mini-Mental State Examination) at Phase 11 | | Measurement: MoCA (Montreal Cognitive Assessment) at Baseline | | Measurement: MMSE (Mini-Mental State Examination) at Wave 2 | Measurement: MMSE (Mini-Mental State Examination) at Wave 5 | Measurement: MMSE (Mini-Mental State Examination) at Round 1 | Measurement: MMSE (Mini-Mental State Examination) at Phase 2 |
| harmonisation | / | | Covert MoCA to MMSE | | / | / | / | / |
| General cognition at TP2 | variable name | DMM_SCOR | | YR3MoCATotalEduadjusted | | W4h_Global_Cognition | MMT::v518 | MMSE_score_StudyRound3 | mmse |
| exact question | Measurement: MMSE (Mini-Mental State Examination) at Phase 12 | | Measurement: MoCA (Montreal Cognitive Assessment) at Yr3 | | Measurement: MMSE (Mini-Mental State Examination) at Wave 4 | Measurement: MMSE (Mini-Mental State Examination) at Wave 6 | Measurement: MMSE (Mini-Mental State Examination) at Round 3 | Measurement: MMSE (Mini-Mental State Examination) at Phase 3 |
| harmonisation | / | | Covert MoCA to MMSE | | / | / | / | / |
| Depressive symptoms at TP1 | variable name | FDPN_SUM | | GDSTOTAL | | M_w2_gds_total | CESD::cesd_sum | CESDscore_StudyRound1 | gds |
| exact question | Measurement: GES-D (Center for Epidemiological Studies-Depression Scale) at Phase 11 | | Measurement: GDS-15 (15-item Geriatric Depression Scale) at Baseline | | Measurement: GDS-15 (15-item Geriatric Depression Scale) at Wave 2 | Measurement: GES-D (Center for Epidemiological Studies-Depression Scale) at Wave 5 | Measurement: GES-D (Center for Epidemiological Studies-Depression Scale) at Round 1 | Measurement: GDS-15 (15-item Geriatric Depression Scale) at Phase 2 |
| harmonisation | Cutoff at 16 0 (CES_D < 16) 1 (CES_D >= 16) | | Cutoff at 5 0 (CES_D < 5) 1 (CES_D >= 5) | | Cutoff at 5 0 (CES_D < 5) 1 (CES_D >= 5) | Cutoff at 16 0 (CES_D < 16) 1 (CES_D >= 16) | Cutoff at 16 0 (CES_D < 16) 1 (CES_D >= 16) | Cutoff at 5 0 (CES_D < 5) 1 (CES_D >= 5) |
| Depressive symptoms at TP2 | variable name | DDPN_SUM | | YR3GDSTotal | | M_w4_gds_total | CESD::cesd_sum | CESDscore_StudyRound3 | gds |
| exact question | Measurement: CES-D (Center for Epidemiological Studies-Depression Scale) at Phase 12 | | Measurement: GDS-15 (15-item Geriatric Depression Scale) at Yr32 | | Measurement: GDS-15 (15-item Geriatric Depression Scale) at Wave 4 | Measurement: CES-D (Center for Epidemiological Studies-Depression Scale) at Wave 6 | Measurement: CES-D (Center for Epidemiological Studies-Depression Scale) at Round 3 | Measurement: GDS-15 (15-item Geriatric Depression Scale) at Phase 3 |
| harmonisation | Cutoff at 16 0 (CES_D < 16) 1 (CES_D >= 16) | | Cutoff at 5 0 (CES_D < 5) 1 (CES_D >= 5) | | Cutoff at 5 0 (CES_D < 5) 1 (CES_D >= 5) | Cutoff at 16 0 (CES_D < 16) 1 (CES_D >= 16) | Cutoff at 16 0 (CES_D < 16) 1 (CES_D >= 16) | Cutoff at 5 0 (CES_D < 5) 1 (CES_D >= 5) |

**Supplementary Table 5b Details of demographic variables used in the canonical correlation analysis and details of variable harmonisation**

| Cohorts | | British Whitehall-II | Hong Kong Chinese CU-RISK | Australian MAS | Swedish Betula | German BASE-II | Singaporean Chinese SLABS |
| --- | --- | --- | --- | --- | --- | --- | --- |
| Sex | variable name | SEX | Sex | M_Sex | Participant::sex | sex | sex |
| exact question | Paticipant gender (0/1) | Paticipant gender (0/1) | Paticipant gender (1/2) | Paticipant gender (1/2) | Paticipant gender (m/w) | Paticipant gender (male/female) |
| harmonisation | 0 (female) 1 (male) | 0 (female) 1 (male) | Relabelling with (0, 1) 2 -> 0 (female) 1 -> 1 (male) | Relabelling with (0, 1) 2 -> 0 (female) 1 -> 1 (male) | Relabelling with (0, 1) w -> 0 (female) m -> 1 (male) | Relabelling with (0, 1) female -> 0 (female) male -> 1 (male) |
| Age | variable name | FAGE_Q | BLAge_DOB | M_w2_AGE | rounded_age_HT | Age_COG_2012_StudyRound1_session1 | age |
| exact question | Age at questionaire completion at Phase 11 | Age at baseline (according to date of birth) | Wave 2 Age | age | Age at cognitive testing Study Round 1 Session 1 | Calculated age in years during visit |
| harmonisation | / | / | / | / | / | / |
| Years of education | variable name | EDUC_FT | Eduyear | M_w2_education | educ_T | Education | edu.yrs |
| exact question | Total years of full-time education | Updated education in years with the confirmed data | Wave 2 Education (in years) | Education in years | Education in years (SOEP): latest available information | Education in years |
| harmonisation | / | / | / | / | / | / |
| Time difference | variable name | time_diff | "BLAssessDate" minus "YR3AssessmentDate" | "M_w2_date" minus "M_w4_date" | "rounded_age_HT" (Wave 5) minus "rounded_age_HT" (Wave 6) | "Age_MED_StudyRound1" minus "Age_MED_StudyRound3" | "age" (Phase 2) minus "age" (Phase 3) |
| exact question | Time interval between Phase 11 and 12 (years) | Time interval between Baseline and Yr32 (years) | Time interval between Wave 2 and Wave 4 (years) | Time interval between Wave 5 and 6 (years) | Time interval between Round 1 and 3 (years) | Time interval between Phase 2 and 3 (years) |
| harmonisation | / | / | / | / | / | / |

**Supplementary Table 5c Details of clinical variables used in the canonical correlation analysis and details of variable harmonisation**

| Cohorts | | British Whitehall-II | Hong Kong Chinese CU-RISK | Australian MAS | Swedish Betula | German BASE-II | Singaporean Chinese SLABS |
| --- | --- | --- | --- | --- | --- | --- | --- |
| Body mass index | variable name | FBMI | BMI | M_w2_bmi | Halsoundersokning::bmi | BMI_StudyRound1 | bmi |
| exact question | Body Mass Index | Body Mass Index | Body Mass Index | Body Mass Index, BMI | Body Mass Index | BMI (kg/m^2) |
| harmonisation | / | / | / | / | / | / |
| Smoking habit | variable name | SMOK_00 | Smoking | M_w1_smoke | Formular2::v1040 | Smoking_now_StudyRound1 | smoking |
| exact question | Have you smoked cigarettes in the past 4 weeks? (0/1) | The smoking status at baseline (1/2/3) 1 Non-smoker  2 Past-smoker  3 Current smoker | ever smoked tobacco regularly? (1/2) 1 No  2 Yes | Smoke, or used to, practically daily? (1/2) 1 yes 2 no | Smoking status: Do you smoke? (1/2/3/4) 1 yes  2 no, not since < 1 year 3 no, not since >= 1 year 4 no, never | (0/1) 1 yes 0 never smoked |
| harmonisation | 0 (No) 1 (Yes) | Relabelling with (0, 1) 1 -> 0 (No) 2/3 -> 1 (Yes) | Relabelling with (0, 1) 1 -> 0 (No) 2 -> 1 (Yes) | Relabelling with (0, 1) 2 -> 0 (No) 1 -> 1 (Yes) | Relabelling with (0, 1) 4 -> 0 (No) 1/2/3 -> 1 (Yes) | 0 (No) 1 (Yes) |
| Level of physical activity | variable name | CHAM_FA | Physicalex (retreiving more details by Research team) | M_w2_Bowls M_w2_Golf M_w2_Tennis M_w2_Swimming M_w2_Dancing M_w2_Jogging M_w2_Bicycling M_w2_Aerobics M_w2_Other_sport | PA_2 | Frequencyno1sports_StudyRound1 | household_minutes_per_week leisure_minutes_per_week work_light_act_minutes_per_week work_moderate_act_minutes_per_week work_vigorous_act_minutes_per_week |
| exact question | Frequency per week of all exercise-related activities (did not include housework, did not request) | Regular participation of physical exercise (0/1) | M_w2_Bowls: bowls (minutes playing) M_w2_Golf: Golf (minutes playing) M_w2_Tennis: Tennis (minutes playing) M_w2_Swimming: Swimming (minutes playing) M_w2_Dancing: Dancing (minutes playing) M_w2_Jogging: Jogging (minutes playing) M_w2_Bicycling: Bicycling (minutes playing) M_w2_Aerobics: Aerobics (minutes playing) M_w2_Other_sport: Other sports (minutes playing) | How much time do you spend doing exercise in a week? | How often doing most important type of sports Study Round 1 (daily, weekly, monthly, more rarely) | household_minutes_per_week: Estimated physical activity at home; leisure_minutes_per_week: Estimated physical activity during spare time; work_light_act_minutes_per_week: Estimated physical activity at work (self-reported light output); work_moderate_act_minutes_per_week: Estimated physical activity at work (self-reported moderate output); work_vigorous_act_minutes_per_week: Estimated physical activity at work (self-reported vigorous output) NOTE: All these variables are during the subject's very first visit |
| harmonisation | Cutoff at median (18 hours ) 0 (CHAM_FA < 18) 1 (CHAM_FA >= 18) | 0/1 | Calculate the sum of the time of all exercise types reported (in hours) - create a new variable as "hours_per_week"  Cutoff at median (1.8 hours ) 0 (hours_per_week < 1.8) 1 (hours_per_week >= 1.8) | Cutoff at median (6.95 hours ) 0 (PA_2 < 6.95) 1 (PA_2 >= 6.95) | If the answer is every day/week, weekly_execrise = 1. Otherwise, weekly_execrise = 0. | Calculate the sum of the time of these 5 kinds of activities (in hours) - create a new variable as "work_exe_totalhours_per_week_C" Cutoff at median (15.92 hours ):  0(work_exe_totalhours_per_week_C < 15.92) 1(work_exe_totalhours_per_week_C >= 15.92) |
| Systolic blood pressure | variable name | FSBP | SitSBPAvg | M_w2_sys1 M_w2_sys2  M_w2_sys3 | Halsoundersoking::bloodpressure_systolic_standing0min | RR_sitting_right_systol_StudyRound1 RR_sitting_left_systol_StudyRound1 | bp.sys |
| exact question | BP Systolic- final averaged | Average Sitting Systolic Blood pressure | M_w2_sys1: systolic blood pressure seated measurement 1 M_w2_sys2: systolic blood pressure seated measurement 2 M_w2_sys3: systolic blood pressure seated measurement 3 | Systolic blood pressure, standing up immidiately | RR_sitting_right_systol_StudyRound1: Systolic blood pressure sitting right arm RR_sitting_left_systol_StudyRound1: Systolic blood pressure sitting left arm | Blood pressure |
| harmonisation | / | / | Taking average ("M_w2_sys1", "M_w2_sys2" and "M_w2_sys3") | / | Take average ("RR_sitting_right_systol_StudyRound1" and "RR_sitting_left_systol_StudyRound1") | / |
| Blood glucose level | variable name | FGLUC_F | FG | M_w2_Glucose | Lab::B_Glucise_Value | Blood_sugar_mgdl_StudyRound1 | fasting_glucose |
| exact question | Glucose: fasting/first (plasma) | Fasting blood | Glucose mmol/L | Blood sample, Measurement of blood sugar (glucose), Value of B-glucose | blood suger (mgdl) | Fasting glucose |
| harmonisation | / | / | / | / | Trasfer the unit from mg/dL to mmol/L | / |
| Hypertension | variable name | FANTIHYP | HT | M_w2_HT | Formular2::v1089 | Diagnosed_Hypertension_StudyRound1 | hypertension |
| exact question | Drug class: Anti-hypertensives (0/1) | The diagnosis of Hypertension (0/1) | in the last 2 years, had high blood pressure diagnosed by a doctor (1/2) | Have you seen a doctor or received hospital care for any of the following illnesses? High bloodpressure, last 5 years [Question was regarding the entire lifetime for new participants, for the last 5yrs for old participants.]. (0/1) | Self-reported history of Hypertension from anamnesis interview. (0/1) | Hypertension (0/1) |
| harmonisation | 0 (No) 1 (Yes) | 0 (No) 1 (Yes) | Relabelling with (0, 1) 1 -> 0 (No) 2 -> 1 (Yes) | 0 (No) 1 (Yes) | 0 (No) 1 (Yes) | 0 (No) 1 (Yes) |
| Diabetes Mellitus | variable name | FDIABET1 | DM | M_w2_diabetes | Formular2::v1090 | Diabetes_Anamnesis_StudyRound1 | diabetes |
| exact question | Diabetic | The diagnosis of Diabetes Mellitus (0/1) | In the last 2 years, had diabetes confirmed by doctor? (1/2/3) 1 no  2 yes - type 1 (juvenile-insulin dependent)  3 yes - type 2 (mature onset-non-insulin dependent) 4 yes - diabetes incipidus | Have you seen a doctor or received hospital care for any of the following illnesses? Diabetes, last 5 years [Question was regarding the entire lifetime for new participants, for the last 5yrs for old participants.]. (0/1) | Diagnose of Diabetes melittus (0/1) | Diabetes (0/1) |
| harmonisation | 0 (No) 1 (Yes) | 0 (No) 1 (Yes) | Relabelling with (0, 1) 1 -> 0 (No) 2/3/4 -> 1 (Yes) | 0 (No) 1 (Yes) | 0 (No) 1 (Yes) | 0 (No) 1 (Yes) |

Supplementary Table 5 showed the details of variables used in the canonical correlation analysis. In addition, details of variable harmonisation were illustrated.

Abbreviations: TP = time-point

| | **Supplementary Table 6 MRI acquisition parameters of the six cohorts** | | | | | | | | | --- | --- | --- | --- | --- | --- | --- | --- | | Cohort | Baseline MRI (n) | Sample size with MRI data & fitting study inclusion criteria | MRI Scanner | Tesla | T1-weighted | Diffusion | FLAIR | | | British Whitehall-II (4) (5) | 800 | 527 | Siemens Magnetom Verio (Whitehall-II imaging sub-study) | 3 | TR: 2530 ms, TE: 1.79/3.65/5.51/7.37 ms, TI: 1380 ms, flip angle: 7°, slice thickness: 1.0 mm, FOV: 256×256 mm | TR: 8900 ms, TE: 91.2 ms, slice thickness: 2.0 mm, FOV: 192×192 mm, b-value:1500 s/mm2, directions: 60 | TR: 9000 ms, TE: 73 ms, TI: 2500 ms, flip angle:150°, slice thickness:3.0 mm, FOV: 220×220 mm | | |  |  |  | Siemens Prisma (British Whitehall-II) | 3 | TR: 1900 ms, TE: 3.97 ms, TI: 904 ms, flip angle: 8°, slice thickness: 1.0 mm, FOV: 192×192 mm | TR: 8900 ms, TE: 91 ms, slice thickness: 2.0 mm, FOV: 192×192 mm, b-value:1500 s/mm2, directions: 60 | TR: 9000 ms, TE: 73 ms, TI: 2500 ms, flip angle:150°, slice thickness:3.0 mm, FOV: 220×220 mm | | | Hong Kong Chinese CU-RISK (6) | 851 | 481 | Philips Achieva TX | 3 | TR: 7.49 ms, TE: 3.46 ms, TI: /, flip angle: 8°, slice thickness: 1.04 mm, matrix size: 285 × 240, resolution: 0.6 × 1.04 mm | TR:8944 ms, TE: 60 ms, slice thickness: 1 mm, matrix size: 224 × 224, resolution: 1 × 1 mm, b-value:1000 s/mm2, directions: 32 | TR: 8000 ms, TE: 328.6 ms, TI: 2400 ms, flip angle:90°, slice thickness: 0.44 mm, matrix size: 301 × 528, resolution: 0.55 × 0.44 mm | | | Australian MAS (7) | 544 | 289 | Philips Achieva Quasar Dual | 3 | TR: 5.75 ms, TE: 2.61 ms, TI: /, flip angle: 8°, slice thickness: 1.0 mm, FOV: 256×256 mm | TR: 7767 ms, TE: 68 ms, slice thickness: 2.5 mm, FOV: 240×240 mm, b-value:1000 s/mm2, directions: 32 | TR: 10000 ms, TE: 110 ms, TI: 2800 ms, flip angle:/, slice thickness:3.5mm, matrix size: 512 × 512, resolution: 0.488 × 0.488 mm | | | Swedish Betula (8) | 292 | 93 | GE Discovery MR750 | 3 | TR: 8.2 ms, TE: 3.2 ms, TI: 450 ms, flip angle: 12°, slice thickness: 1.0 mm, FOV: 250×250 mm | TR: 8000 ms, TE: 84.4 ms, slice thickness: 2.0 mm, FOV: 250×250 mm, b-value:1000 s/mm2, directions: 32 | NA | | | German BASE-II (9) | 319 | 102 | Siemens Tim Trio | 3 | TR: 2500 ms, TE: 4.77 ms, TI: 1100 ms, flip angle: 7°, slice thickness: 1.0 mm, FOV: 256×256 mm | TR: 9700 ms, TE: 120 ms, slice thickness: 2 mm, FOV: 224×224 mm, b-value:2850 s/mm2, directions: 60 | TR:10000 ms, TE: 97 ms, TI: 2601.3 ms, flip angle: 125°, slice thickness:3 mm, FOV: / | | | Singaporean Chinese SLABS (10) | 289 | 81 | Siemens Tim Trio | 3 | TR: 2300 ms, TE: 2.98 ms, TI: 900 ms, flip angle: 9°, slice thickness: 1.0 mm, FOV: 256×240 mm | TR:9600 ms, TE: 107 ms, slice thickness: 2 mm, FOV: 256×256mm, b-value:1000 s/mm2, directions: 30 | TR: 10000 ms, TE: 96 ms, TI: 2500 ms, flip angle: /, slice thickness: 5mm, FOV: / | | | Supplementary Table 6 illustrated the MRI acquisition parameters of the six cohorts.  Note: The FLAIR images at waves 5 & 6 from the Swedish cohort were available but inaccessible at the time of analyses, hence, white matter hyperintensity volume was not assessed in this cohort. | | | | | | | | |
| --- | --- | --- | --- | --- | --- | --- | --- | --- | --- | --- | --- | --- | --- | --- | --- | --- | --- | --- | --- | --- | --- | --- | --- | --- | --- | --- | --- | --- | --- | --- | --- | --- | --- | --- | --- | --- | --- | --- | --- | --- | --- | --- | --- | --- | --- | --- | --- | --- | --- | --- | --- | --- | --- | --- | --- | --- | --- | --- | --- | --- | --- | --- | --- | --- | --- | --- | --- | --- | --- | --- | --- | --- | --- | --- | --- | --- | --- | --- | --- | --- | --- | --- | --- | --- | --- | --- | --- | --- |

References

1. Trzepacz PT, Hochstetler H, Wang S, Walker B, Saykin AJ, Initiative AsDN. Relationship between the Montreal Cognitive Assessment and Mini-mental State Examination for assessment of mild cognitive impairment in older adults. BMC geriatrics. 2015;15:1-9.

2. Adams S, Conner S, Himali JJ, Beiser A, Vasan RS, Seshadri S, et al. Vascular risk factor burden and new-onset depression in the community. Prev Med. 2018;111:348-50.

3. Shin C, Park MH, Lee S-H, Ko Y-H, Kim Y-K, Han K-M, et al. Usefulness of the 15-item geriatric depression scale (GDS-15) for classifying minor and major depressive disorders among community-dwelling elders. Journal of Affective Disorders. 2019;259:370-5.

4. Filippini N, Zsoldos E, Haapakoski R, Sexton CE, Mahmood A, Allan CL, et al. Study protocol: the Whitehall II imaging sub-study. BMC psychiatry. 2014;14(1):1-16.

5. Bordin V, Bertani I, Mattioli I, Sundaresan V, McCarthy P, Suri S, et al. Integrating large-scale neuroimaging research datasets: Harmonisation of white matter hyperintensity measurements across Whitehall and UK Biobank datasets. NeuroImage. 2021;237:118189.

6. Lam BYK, Leung K, Yiu B, Zhao L, Biesbroek J, Au L, et al. Peak width of skeletonized mean diffusivity and its association with age-related cognitive alterations and vascular risk factors. Alzheimer's & Dementia: Diagnosis, Assessment & Disease Monitoring 2019;11:721-9.

7. Sachdev PS, Brodaty H, Reppermund S, Kochan NA, Trollor JN, Draper B, et al. The Sydney Memory and Ageing Study (MAS): methodology and baseline medical and neuropsychiatric characteristics of an elderly epidemiological non-demented cohort of Australians aged 70–90 years. International psychogeriatrics. 2010;22(8):1248-64.

8. Dunås T, Wåhlin A, Nyberg L, Boraxbekk CJ. Multimodal Image Analysis of Apparent Brain Age Identifies Physical Fitness as Predictor of Brain Maintenance. Cereb Cortex. 2021;31(7):3393-407.

9. Wenger E, Düzel S, Polk SE, Bodammer NC, Misgeld C, Porst J, et al. Vamos en bici: Study protocol of an investigation of cognitive and neural changes following language training, physical exercise training, or a combination of both. bioRxiv. 2022:2022.01.30.478181.

10. Hong Z, Ng KK, Sim SK, Ngeow MY, Zheng H, Lo JC, et al. Differential age-dependent associations of gray matter volume and white matter integrity with processing speed in healthy older adults. Neuroimage. 2015;123:42-50.

**Supplementary Figure 1 Variable contributions (cross-loadings) in modes 2 and 3**

**
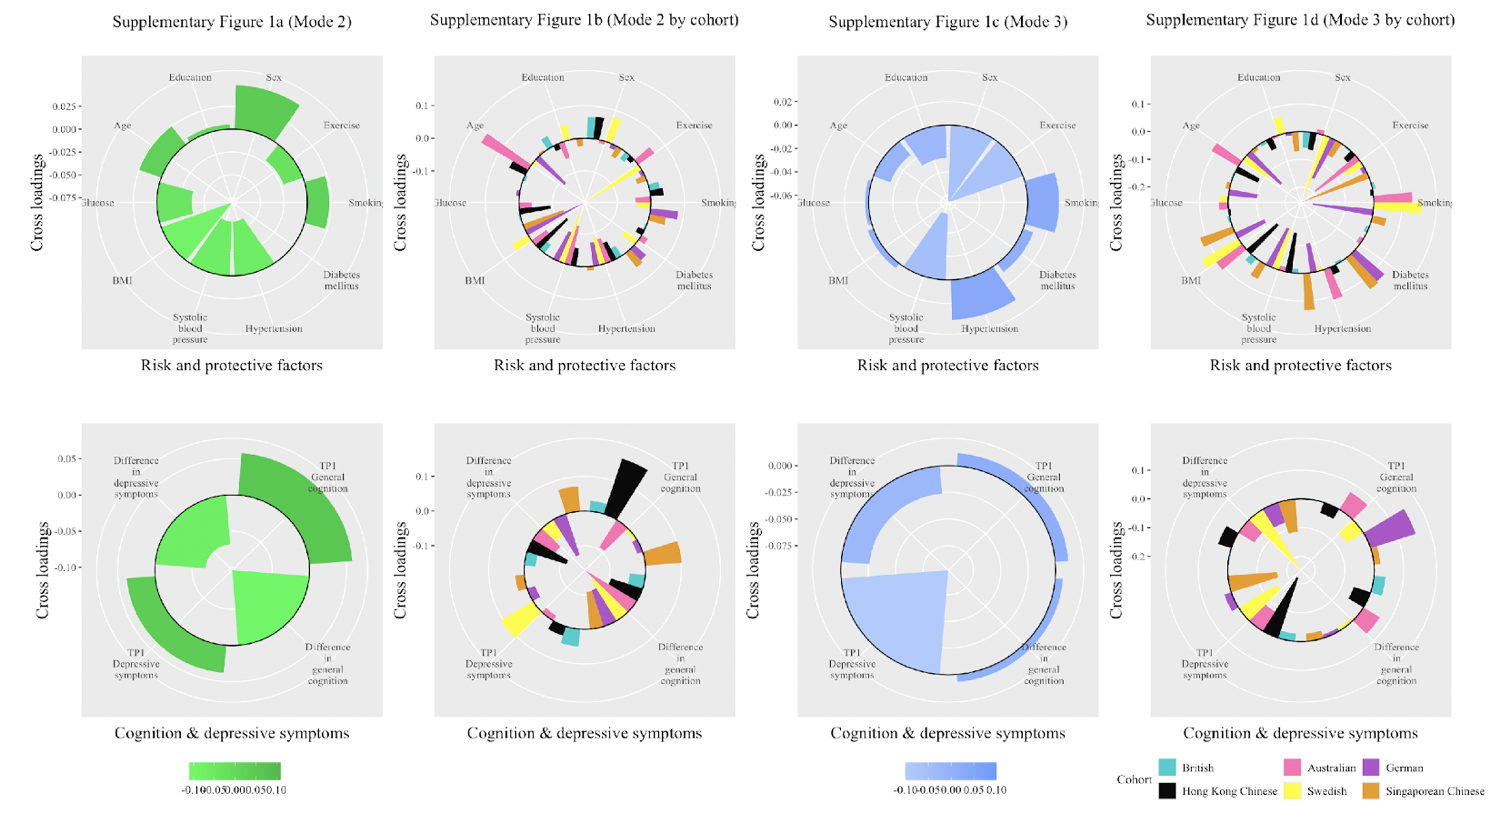
**

Supplementary Figure 1: The top panel shows the crossing loadings of risk and protective factors for each individual cohort in mode 2 (1a), mode 2 but separated by each cohort (1b), in mode 3 (1c), and in mode 3 but separated by cohort (1d). The bottom panel shows the cross loadings of cognitive and depressive symptoms for each individual cohort in mode 2 (1a), mode 2 but separated by each cohort (1b), in mode 3 (1c), and in mode 3 but separated by cohort (1d). Cross-loadings outside of the black circle indicates a positive loading while those inside of the black circle refers a negative loading.
